# Supplementary material
Source: publisher figshare collection journal article supplement (https://acs.figshare.com/ndownloader/files/4524682)
Supplement: Supplementary file 1 [file 4524682]

# Enhanced Conversion of Racemic $\alpha$ - Arylalanines to (*R*)- $\beta$ -Arylalanines by Coupled Racemase/Aminomutase Catalysis

*Brad M. Cox,<sup>†</sup> Joshua B. Bilsborrow,<sup>†</sup> and Kevin D. Walker<sup>\*†‡</sup>*

Department of Chemistry,<sup>†</sup> and Department of Biochemistry and Molecular Biology,<sup>‡</sup>

Michigan State University, East Lansing, MI 48824

**Supporting Information**

### *Chemicals.*

The following commercially available  $\alpha$ -amino acids were used without further purification:

$\alpha$ -Amino acids (*S*)-, (*R*)- and (*R,S*)- $\alpha$ -phenylalanines

(*S*)-3-(2'-thienyl)alanine

(*R,S*)-3-(2'-thienyl)alanine

(*S*)-2-Amino-3-(3-methylphenyl)propionic acid

(*S*)-2-amino-3-(2-fluorophenyl)propionic acid

(*S*)-2-amino-3-(3-fluorophenyl)propionic acid,

(*S*)-2-amino-3-(4-fluorophenyl)propionic acid

(*S*)-2-amino-3-(2-furanyl)propionic acid

(*S*)-2-amino-3-(4-methylphenyl)propionic acid

The (*R,S*)-racemates of the following:

2-amino-3-(2-fluorophenyl)propionic acid

2-amino-3-(3-fluorophenyl)propionic acid

2-amino-3-(4-fluorophenyl)propionic acid

The following were synthesized by enzymatic isomerization of their corresponding (*S*)-amino acids (The details of the epimerization reaction are described in the Experimental Section of the main document):

(*R,S*)-2-Amino-3-(3-methylphenyl)propionic acid,

(*R,S*)-2-amino-3-(4-methylphenyl)propionic acid

(*R,S*)-2-amino-3-(2-furanyl)propionic acid

The following commercially available  $\beta$ -amino acids were used without further purification:

(*R*)-3-amino-3-phenylpropionic acid,

(*S*)-3-amino-3-phenylpropionic acid

(*R*)-3-amino-3-(3-methylphenyl)propionic acid

(*R*)-3-amino-3-(4-methylphenyl)propionic acid

(*R*)-3-amino-3-(2-fluorophenyl)propionic acid

(*R*)-3-amino-3-(3-fluorophenyl)propionic acid

(*R*)-3-Amino-3-(4-fluorophenyl)propionic acid

All other reagents were used without further purification, unless otherwise noted.
